# Supplementary material for: Global distribution of the sickle cell gene and geographical confirmation of the malaria hypothesis
Source: PubMed Central journal article supplement — Nat Commun. 2010 Nov 2;1:104–. doi: 10.1038/ncomms1104 (PMC3060623; doi:10.1038/ncomms1104), 2010-11-02
Supplement: ncomms1104-s1.pdf [file ncomms1104-s1.pdf]

## **Supplementary Information**

The content of this supplementary information is summarised as:

### **1. Supplementary Figures**

Supplementary Figure S1. Violin plots of the HbS posterior predictive distribution

Supplementary Figure S2. Temporal distribution of the data points

### **2. Supplementary Methods**

The choice of a malaria map

Bayesian model-based geostatistical framework

### **3. Supplementary References**

## Supplementary Figures

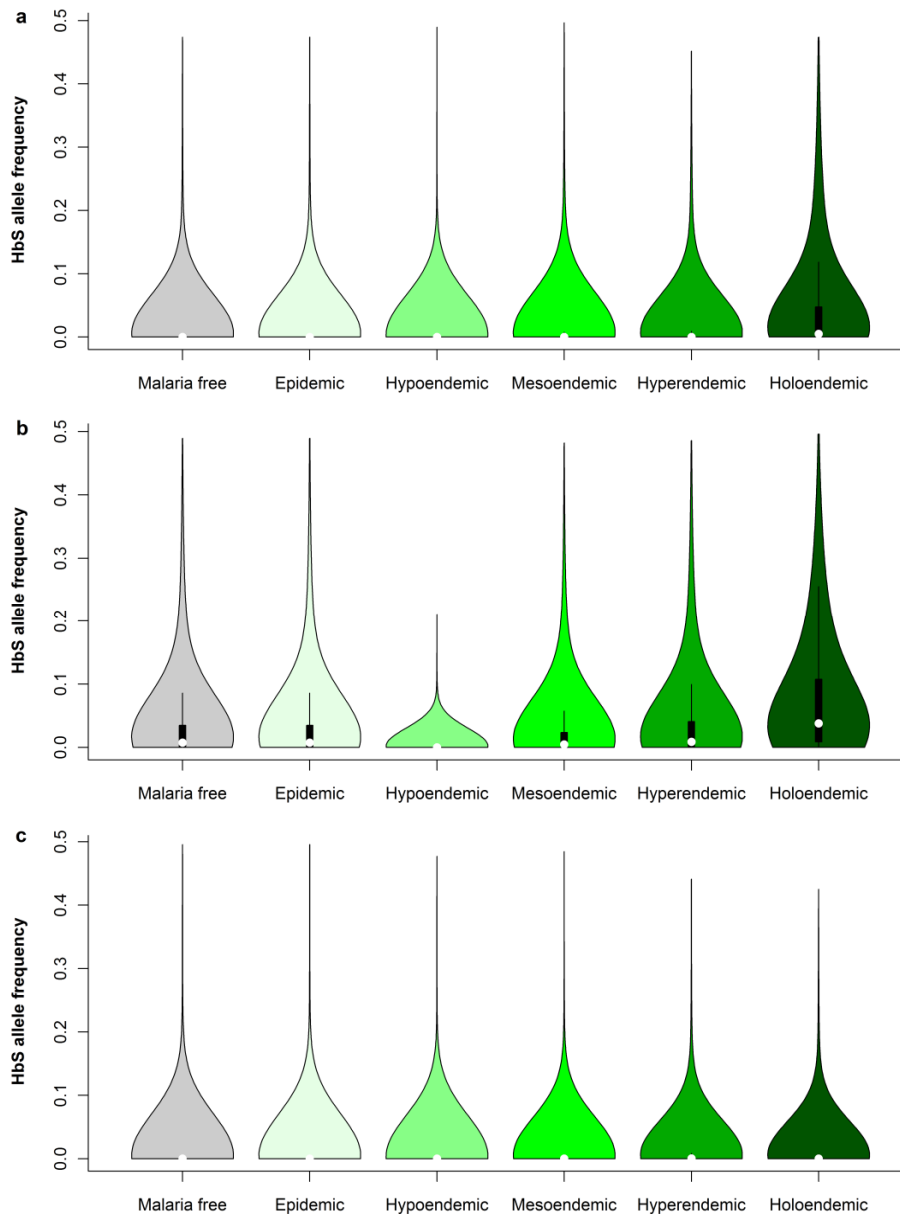

### Supplementary Figure S1. Violin plots of the HbS posterior predictive distribution.

Predictive distribution of HbS prevalence at a uniformly-distributed point within each endemicity region for the world (a), Africa-Europe (b), and Asia (c). The green areas match the colours used in the Lysenko map (Fig. 2c) and show a smoothed approximation of the frequency distribution (a kernel density plot) of the predicted allele frequency within each endemicity class. The black central bar indicates the interquartile range and the white circles indicate the median values. The plots have been adjusted to an equal-area projection of the Earth

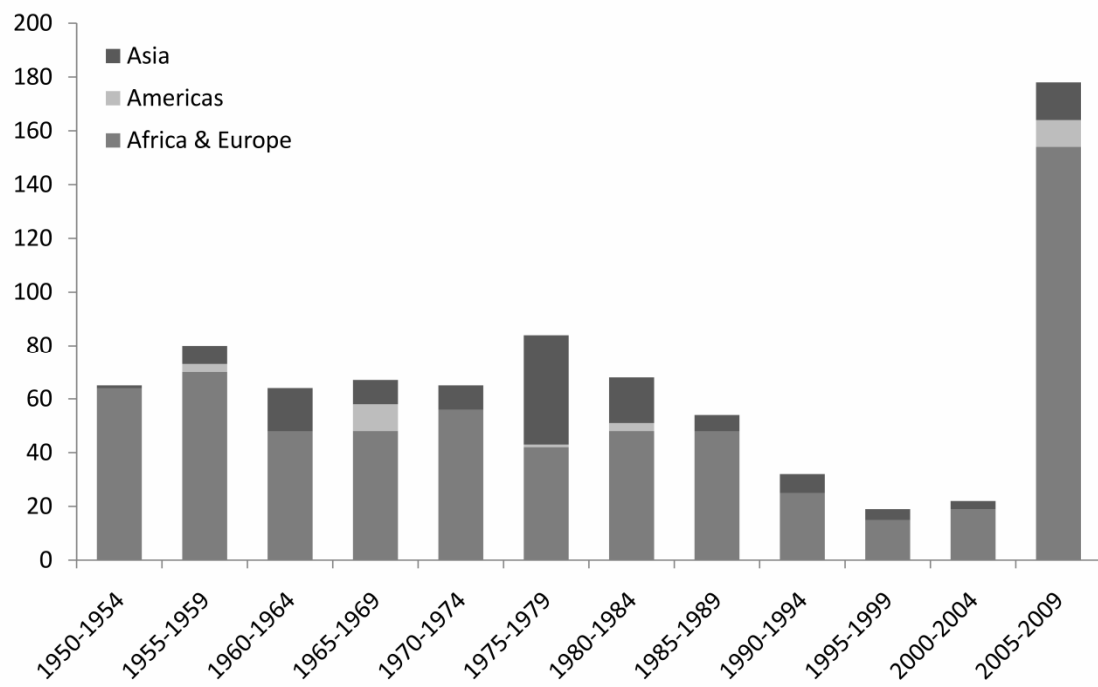

**Supplementary Figure S2. Temporal distribution of the data points.** The regional sub-divisions (the Americas in light grey; Africa, including the western part of Saudi Arabia, and Europe in medium grey; and Asia in dark grey), are shown in Figure 2a of the main manuscript.

## Supplementary Methods

### The choice of a malaria map

The Malaria Atlas Project (MAP, [www.map.ox.ac.uk](http://www.map.ox.ac.uk)) has recently invested considerable efforts in refining the limits and the malaria endemicity maps for *Plasmodium falciparum*<sup>46</sup> and *P. vivax*<sup>47</sup>. Despite the quality of such products, these contemporary maps cannot be used to investigate the spatial link between the distribution of haemoglobin S (HbS) and malaria. Here we are interested in the historical spatial relationship between HbS and malaria, not in their contemporary distributions, which have changed considerably over the last 50 years due to human migration (as, for instance, indicated by the prevalence of HbS in African Americans or Mediterranean immigrants in North America), epidemiological transition, and human interventions. Amongst numerous global malaria maps<sup>46, 48-55</sup>, only one<sup>56,57</sup> provides a reliable global proxy of pre-intervention malaria endemicity. Its main advantages lie in the efforts made by its authors to gather comprehensive information from the literature and from expert opinion, in order to map malaria globally at the peak of its distribution (c.1900).

## Bayesian model-based geostatistical framework

**The model for HbS allele frequency.** The HbS allele frequency  $s$  was modelled using a Bayesian spatial generalized linear model (GLM)<sup>58</sup>. The core of the model was a Gaussian process (GP)<sup>58</sup>, denoted  $f$ . A GP is a probability distribution for functions, which can be used as a prior for unknown functions in Bayesian statistics<sup>58,59</sup>. In this model, a Gaussian process prior was assigned to transformed HbS allele frequency. The model form can be defined using the following statements:

$$m \sim \text{Normal}(0, 10000)$$

$$\phi \sim \text{Exponential}(.1)$$

$$\psi \sim \text{Uniform}(0, 1)$$

$$\phi_s = \psi\phi$$

$$\phi_l = (1 - \psi)\phi$$

$$\theta_l \sim \text{Exponential}(.1)$$

$$\theta_s \sim \text{Exponential}(.1)1_{\theta_s < \theta_l}$$

$$\nu \sim \text{Uniform}(.1, 3)$$

$$M(x) = m$$

$$C(x, y) = \phi_s \text{Matern}(d(x, y)/\theta_s; \nu) + \phi_l \exp[-(d(x, y)/\theta_l)^2]$$

$$f \sim \text{GP}(M, C)$$

$$s(x) = \text{logit}^{-1}(f(x))$$

The mean function simply returned constant  $m$ , and no covariates were used. We used a

“nested” covariance function consisting of two components: a long-range Gaussian

component and a short-range Matern component<sup>59</sup>. The range parameters of the two

components were  $\theta_l$  and  $\theta_s$ , respectively. The overall amplitude parameter  $\phi$  was partitioned between the long-scale and short-scale components with proportions  $(1 - \psi)$  and  $\psi$ , respectively, to obtain component-specific amplitude parameters  $\phi_l$  and  $\phi_s$ . The degree of differentiability  $\nu$  of the Matern component was learned from the data alongside the other parameters. A global “nugget variance”  $V$  was assumed.

The distance function  $d$  gave the great-circle distance between  $x$  and  $y$ , unless  $x$  was in

the Americas and  $y$  was in Eurasia or Africa, in which case it returned  $\infty$ . This modification prevented data in Africa from unduly influencing the east coast of South America. This method was preferred to a regional covariate which would influence the mean and covariance within each region.

**Likelihoods.** We assumed that Hardy-Weinberg<sup>60,61</sup> assumptions applied in all sampled

populations, so newborns were in proportions:

$$\begin{aligned} AA_0 &= a_0^2 \\ AS_0 &= 2a_0s_0 \\ SS_0 &= s_0^2. \end{aligned}$$

where AA corresponds to the normal homozygous individuals, AS to the heterozygous carriers of HbS, and SS to the homozygous individuals with sickle cell anaemia. The “0” subscript denotes newborns. However, we assumed that all SS individuals died before reaching the age of reproduction, so to preserve equilibrium the reproductive population would be in proportions:

$$\begin{aligned} AA : \quad & \frac{a_0^2}{a_0^2 + 2ka_0s_0} = 1 - 2s \\ AS : \quad & \frac{2ka_0s_0}{a_0^2 + 2ka_0s_0} = 2s \\ SS : \quad & 0 \end{aligned}$$

where the coefficient  $k$  can be determined from  $s$  and from the fact that allele frequencies in newborns have to match allele frequencies in reproductive individuals. We assumed that the observed frequencies more closely matched those of the reproductive population than of the newborn population. Accordingly, we discarded the few SS records in the database.

A binomial sampling model was assumed for the number  $n_{AS}$  of heterozygous individuals observed at each data location  $x$ , given the number  $n$  sampled and the allele frequency  $s$ .

$$n_{AS}(x) \sim \text{Binomial}(n(x), 2s(x))$$

This likelihood specification completes the Bayesian probability model in the previous section.

A sensitivity analysis (not presented here) revealed that, for the small SS prevalences observed, the likelihood functions did not change substantially when the SS individuals were incorporated and Hardy-Weinberg frequencies were assumed.

**Implementation.** The model was implemented in the Python (<http://www.python.org>) programming language. The code is available from the MAP's code repository (<http://github.com/malaria-atlas-project/ibd-world>). It was fitted with the Markov chain Monte Carlo algorithm<sup>62</sup> using the open-source Bayesian analysis package PyMC<sup>63</sup>. All

scalar parameters in the model were updated using the standard one-at-a-time Metropolis algorithm with a normal transition density<sup>62</sup>. The evaluation of  $f$  at the data locations, which has a multivariate normal full conditional distribution, was updated using Gibbs steps<sup>62</sup>. Dynamic traces<sup>62</sup> are available upon request. Maps were generated using Python and Fortran code available from the MAP's code repository (<http://github.com/malaria-atlas-project/generic-mbg>).



**Map Uncertainty.** Bayesian geostatistical analysis<sup>58</sup> makes it possible to estimate the uncertainty associated with model predictions. In comparison, when using traditional uncertainty measures (such as the kriging standard deviation) it is not possible to determine the probability of finding a value within a certain range (e.g. the probability of finding an allele frequency of between 10% and 15% in one location) or to find the range of values most likely to be found in an area where no data is available. High uncertainties are typically associated with a high heterogeneity of variables in an area (e.g. presence of both high and low allele frequencies separated by short distances in Africa) or with the absence of data over a large area (e.g. in Mauritania, Niger, Libya and Iran within the sickle cell area, in western parts of Russia and China outside the sickle cell area). Non-zero uncertainty predicted in parts of Oceania represent a local artefact of the model due to the very low density of data points in that part of the world. In the Americas, a similar effect was prevented by the higher number of data points showing absences and the artificially increased distance across the Atlantic, to avoid HbS AF from Western Africa influencing the prediction in Brazil. See Figure 3.

**Validation metrics.** In order to estimate the predictive skill of our geostatistical model, a 10% semi-random sample of the data was held out. A minimum distance of 100 km between points was imposed during the random sampling process to insure a good coverage of the hold out sample. The model was run with the thinned 90% of the data, allowing a comparison between the model's predictions and the observed allele frequencies of the 10% of the data which had been held out, and allowing the calculation of the prediction's mean error and mean absolute error. The mean error is the average distance between the actual data points and the predicted values. The

absolute mean error is a measure of the average magnitude of the errors in the predicted values. They provide a measure of the model's overall bias and overall accuracy, respectively.

**Probabilities of categorical increases.** The difference in the mean values of  $s(x)$  between Lysenko<sup>56</sup> regions 1 (malaria free) and 2 (epidemic) is:

$$E[s(X_1) - s(X_2)]$$

where the random variable  $X_1$  is a location uniformly distributed within Lysenko region 1, and likewise for  $X_2$ . This figure can be approximated using  $n$  independent realizations  $\{x_1^1, \dots, x_n^1\}$  of  $X_1$  and a corresponding set of realizations for  $X_2$ :

$$E[L(X_1) - L(X_2)] = \frac{1}{n} \sum_{i=1}^n L(x_i^1) - L(x_i^2).$$

This procedure was conducted using  $n = 100$  and 5% of the parameter samples in the dynamic trace, selected at random. To assess the Monte Carlo standard error of the approximation, the procedure was repeated to compute the standard deviation using 100 different realizations of  $X_1$  and  $X_2$  and subsets of the dynamic trace (see Figure 5 and Supplementary Figure S2).

## Supplementary References

- 46 Hay, S. I. *et al.* A world malaria map: *Plasmodium falciparum* endemicity in 2007. *Public Library of Science Medicine*. **6**, e1000048 (2009).
- 47 Guerra, C. A. *et al.* The international limits and population at risk of *Plasmodium vivax* transmission in 2009. *Public Library of Science Neglected Tropical Diseases*. **4**, e774 (2010).
- 48 Boyd, M. F. *An introduction to malariology* (Harvard Univ. Press, 1930).
- 49 Macdonald, G. in *The epidemiology and control of malaria*. 63-99 (Oxford Univ. Press, 1957).
- 50 WHO. Malaria eradication in 1965. *World Health Organization Chronicle*. **20**, 286-300 (1966).
- 51 Dutta, H. M. & Dutt, A. K. Malarial ecology: a global perspective. *Social Science and Medicine*. **12**, 69-84 (1978).
- 52 WHO. Information on the world malaria situation. *Weekly Epidemiological Record*. **52** (1977).
- 53 Mouchet, J. *et al.* *Paludisme et grandes régions biogéographiques. Biodiversité du paludisme dans le monde* (John Libbey Eurotext, 2004).
- 54 WHO. World malaria situation in 1992. Part II. *Weekly Epidemiological Record*. **69**, 317-324 (1994).
- 55 WHO. World malaria situation in 1994. Part I. *Weekly Epidemiological Record*. **72**, 269-274 (1997).
- 56 Lysenko, A. J. & Semashko, I. N. in *Itogi Nauki: Medicinskaja Geografija* (ed Lebedew, A. W.) 25-146 (Academy of Sciences, USSR, 1968).
- 57 Hay, S. I., Guerra, C. A., Tatem, A. J., Noor, A. M. & Snow, R. W. The global distribution and population at risk of malaria: past, present, and future. *Lancet Infectious Diseases*. **4**, 327-336 (2004).
- 58 Diggle, P. J. & Ribeiro Jr, P. J. *Model-based Geostatistics* (Springer, 2007).
- 59 Banerjee, S., Carlin, B. P. & Gelfand, A. E. *Hierarchical modeling and analysis for spatial data* (Chapman & Hall, 2003).
- 60 Hardy, G. H. Mendelian proportions in a mixed population. *Science* **28**, 49-50 (1908).
- 61 Weinberg, W. Über den Nachweis der Vererbung beim Menschen. *Jahresh Wuerthl Verh Vaterl Naturkd* **64**, 369-382 (1908).
- 62 Gilks, W. R., Richardson, S. & Spiegelhalter, D. *Markov Chain Monte Carlo in Practice* (Chapman & Hall, 1995).
- 63 Patil, A. P., Huard, D. & Fonnesbeck, C. J. PyMC: Bayesian stochastic modelling in Python. *Journal of Statistical Software*. **35**, 1-81 (2010).
- 64 Acemoglu, H., Beyhun, N. E., Vancelik, S., Polat, H. & Guraksin, A. Thalassaemia screening in a non-prevalent region of a prevalent country (Turkey): is it necessary? *Public Health* **122**, 620-624 (2008).
- 65 Achidi, E. A., Salimonu, L. S., Asuzu, M. C., Berzins, K. & Walker, O. Studies on *Plasmodium falciparum* parasitemia and development of anemia in Nigerian infants during their first year of life. *American Journal of Tropical Medicine and Hygiene* **55**, 138-143 (1996).
- 66 Acquaye, C. T. A. & Oldham, J. H. Variants of haemoglobin and glucose-6-phosphate dehydrogenase - I. Distribution in Southern Ghana. *Ghana Medical Journal* **12**, 412-418 (1973).
- 67 Adadevoh, B. K. & Dada, O. A. Contraception and haemoglobinopathies in Ibadan, Nigeria. An evaluation of the effect on anaemia. *Tropical and Geographical Medicine* **29**, 77-81 (1977).

- 68 Adewuyi, J. O. & Gwanzura, C. Frequency of the sickle haemoglobin gene in Zimbabwe. *East African Medical Journal* **71**, 204-206 (1994).
- 69 Agrawal, H. N. A short note on a study of A.B.O. blood groups, P.T.C. taste sensitivity, middle phalangeal hairs and sickle cell trait among the Wad Balgel of Andhra Pradesh. *Bulletin of the Anthropological Survey India* **13**, 111-113 (1964).
- 70 Agrawal, H. N. ABO blood group and the sickle cell investigations among the Shompen of Great Nicobar. *Journal of the Indian Anthropological Society* **1**, 149-150 (1966).
- 71 Ahmad, S. H. & Chaudhury, D. ABO blood groups and sickle cell trait among the Pardhan of Mandla district. *Man in India* **60**, 235-244 (1980).
- 72 Aidoo, M. *et al.* Protective effects of the sickle cell gene against malaria morbidity and mortality. *Lancet* **359**, 1311-1312 (2002).
- 73 Akinkugbe, F. M. Anaemia in a rural population in Nigeria (Ilorin). *Annals of Tropical Medicine and Parasitology* **74**, 625-633 (1980).
- 74 Akoglu, T., Ozer, F. L. & Akoglu, E. The coincidence of glucose-6-phosphate dehydrogenase deficiency and hemoglobin S gene in Cukurova Province, Turkey. *American Journal of Epidemiology* **123**, 677-680 (1986).
- 75 Al-Awamy, B. H., Al-Musan, M., Al-Turki, M. & Serjeant, G. R. Neonatal screening for sickle cell disease in the Eastern Province of Saudi Arabia. *Transactions of the Royal Society of Tropical Medicine and Hygiene* **78**, 792-794 (1984).
- 76 Alexanderides, C. in *Proceedings of the 9th Congress of the European Society for Haematology (Lisbon, 1963)* S, Karger. 477-495.
- 77 Allard, R. A propos de la conservation génétique du sickle cell trait. *Annales de la Société Belge de Médecine Tropicale* **35**, 649-660 (1955).
- 78 Allbrook, D. *et al.* Blood groups, haemoglobin and serum factors of the Karamojo. *Human Biology* **37**, 217-237 (1965).
- 79 Allen, S. J. *et al.* Morbidity from malaria and immune responses to defined Plasmodium falciparum antigens in children with sickle cell trait in The Gambia. *Transactions of the Royal Society of Tropical Medicine and Hygiene* **86**, 494-498 (1992).
- 80 Allison, A. C. The sickle-cell trait in the Mediterranean area. *Man* **53**, 31 (1953).
- 81 Allison, A. C. The distribution of the sickle-cell trait in East Africa and elsewhere, and its apparent relationship to the incidence of subtertian malaria. Protection afforded by sickle-cell trait against subtertian malarial infection. *Transactions of the Royal Society of Tropical Medicine and Hygiene* **48**, 312-318 (1954).
- 82 Allison, A. C. The sickle-cell and haemoglobin C genes in some African populations. *Annals of Human Genetics* **21**, 67-89 (1956).
- 83 Aluoch, J. R. Higher resistance to Plasmodium falciparum infection in patients with homozygous sickle cell disease in western Kenya. *Tropical Medicine and International Health* **2**, 568-571 (1997).
- 84 Arends, A. Pers. Com. (2009).
- 85 Arends, T. Absence of abnormal haemoglobins in Colombian Tunebo Indians. *Nature* **190**, 93-94 (1961).
- 86 Arends, T., Garlin, G., Anchustogut, M. & Arends, T. Variants hemoglobinicas Gamma type de talasemia de origen espanol en la poblacion venecolana. *Sangre* **28**, 542-550 (1983).
- 87 Asghar, M. & Sachdeva, M. P. Glucose-6-phosphate dehydrogenase deficiency and sickle cell hemoglobin among the Dhodias of Dadra Nagar Haveli. *Anthropologist* **11**, 61-62 (2009).
- 88 Askoy, M. & Erdem, S. Abnormal hemoglobins and thalassemia in Eti-Turks living in Antakya. *Medical Bulletin of Istanbul Medical Faculty* **1**, 296-301 (1968).
- 89 Atkinson, S. H. *et al.* Seasonal childhood anaemia in West Africa is associated with the haptoglobin 2-2 genotype. *Public Library of Science Medicine* **3**, e172 (2006).
- 90 Aung Than, B. & Pe, U. H. Haemoglobinopathies in Burma. I. The incidence of haemoglobin E. *Tropical and Geographical Medicine* **23**, 15-19 (1971).

- 91 Ayodo, G. *et al.* Combining evidence of natural selection with association analysis increases power to detect malaria-resistance variants. *American Journal of Human Genetics* **81**, 234-242 (2007).
- 92 Baghernajad-Salehi, L. *et al.* A pilot beta-thalassaemia screening program in the Albanian population for a health planning program. *Acta Haematologica* **121**, 234-238 (2009).
- 93 Balgir, R. S. Genetic heterogeneity of population structure in 15 major scheduled tribes in central-eastern India: A study of immuno-hematological disorders. *Indian Journal of Human Genetics* **12**, 86-92 (2006).
- 94 Balgir, R. S., Murmu, B. & Dash, B. P. Hereditary hemolytic disorders among the Ashram school children in Mayurbhanj district of Orissa. *Journal of the Association of Physicians of India* **47**, 987-990 (1999).
- 95 Barclay, G. P., Jones, H. I. & Splaine, M. A survey of the of sickle cell trait and glucose-6-phosphate dehydrogenase deficiency in Zambia. *Transactions of the Royal Society of Tropical Medicine and Hygiene* **64**, 78-93 (1970).
- 96 Basu, S., Jindal, A., Kumar, C. S. & Khan, A. S. Genetic marker profile of primitive Kutia Kondh tribal population of Phulbani district (Orissa). *Indian Journal of Medical Research* **101**, 36-38 (1995).
- 97 Basu, S., Kumar, A., Sachdeva, M. P. & Saraswathy, K. N. Incidence of NESTROFT-positives and haemoglobin S among the Jats and Brahmins of Sampla, Haryana. *Anthropologist* **10**, 203-205 (2008).
- 98 Bayoumi, R. A., Taha, T. S. & Saha, N. A study of some genetic characteristics of the Fur and Baggara tribes of the Sudan. *American Journal of Physical Anthropology* **67**, 363-370 (1985).
- 99 Beall, C. M. *et al.* An Ethiopian pattern of human adaptation to high-altitude hypoxia. *Proceedings of the National Academy of Sciences of the United States of America* **99**, 17215-17218 (2002).
- 100 Becquet, R., Gasteau, T. & Happi, C. Drepanocytosis in Pays Bamileke (Cameroons). Statistical study. *Bulletin de la Société de Pathologie Exotique et de ses Filiales* **52**, 836-843 (1959).
- 101 Ben Rachid, M. S., Farhat, M. & Brumpt, L. C. Hémoglobinopathies en Tunisie. *Nouvelle Revue Française d'Hématologie* **7**, 393-400 (1967).
- 102 Bernstein, R. E. in *Science and Medicine in Central Africa* (ed Snowball GJ) 739-747 (Pergamon Press, 1965).
- 103 Bernstein, S. C., Bowman, J. E. & Kaptue Noche, L. Population studies in Cameroon: hbs, G-6pd deficiency and falciparum malaria. *Human Heredity* **30**, 251-258 (1980).
- 104 Bianco, I., Graziani, B., Salvini, P., Mastromonaco, I. & Silvestroni, E. Fréquence et caractères de l'alpha-microcytémie dans les populations de la Sardaigne septentrionale. Premiers résultats. *Nouvelle Revue Française d'Hématologie* **12**, 191-200 (1972).
- 105 Bienzle, U. *et al.* The distribution and interaction of haemoglobin variants and the beta thalassaemia gene in Liberia. *Human Genetics* **63**, 400-403 (1983).
- 106 Bienzle, U., Okoye, V. C. & Gogler, H. Haemoglobin and glucose-6-phosphate dehydrogenase variants: distribution in relation to malaria endemicity in a Togolese population. *Zeitschrift für Tropenmedizin und Parasitologie* **23**, 56-62 (1972).
- 107 Biondi, G. *et al.* Distribution of the S and C hemoglobins in Atakora District (Benin). *Human biology; an international record of research* **52**, 205-213 (1980).
- 108 Blackwell, R. Q., Tung-Hsiang Huang, J. & Chien, L. C. Abnormal hemoglobin characteristics of Taiwan aborigines. *Human biology; an international record of research* **37**, 343-356 (1965).
- 109 Blake, N. M., Ramesh, A., Vijayakumar, M., Murty, J. S. & Bhatia, K. K. Genetic studies on some tribes of the Telangana region, Andhra, Pradesh, India. *Acta Anthropogenetica* **5**, 41-56 (1981).

- 110 Blakebrough, I. S., Greenwood, B. M., Whittle, H. C., Bradley, A. K. & Akintunde, A. Sickle cell trait and the immune response to meningococcal vaccines. *Transactions of the Royal Society of Tropical Medicine and Hygiene* **75**, 905-906 (1981).
- 111 Blumberg, B. S., Allison, A. C. & Garry, B. The haptoglobins and haemoglobins of Alaskan Eskimos and Indians. *Annals of Human Genetics* **23**, 349-356 (1959).
- 112 Bobhate, S. K., Kabinwar, N. & Sonule, S. S. Incidence of sickle cell disease in Chandrapur area. *Indian Journal of Medical Sciences* **37**, 201-203 (1983).
- 113 Bories, S. Etude des groupes sanguins ABO, MN, des types Rh, des antigenes Kell et Duffy et de la sicklemie chez les tahitiens. *Le Sang* **30**, 237-244 (1959).
- 114 Bouloux, C., Gomila, J. & Langaney, A. Hemotypology of the Bedik. *Human biology; an international record of research* **44**, 289-302 (1972).
- 115 Bouyou-Akotet, M. K. *et al.* Prevalence of Plasmodium falciparum infection in pregnant women in Gabon. *Malaria Journal* **2**, 18 (2003).
- 116 Boyer, S. H., Crosby, E. F., Fuller, G. F., Ulenurm, L. & Buck, A. A. A survey of hemoglobins in the Republic of Chad and characterization of hemoglobin Chad: alpha-2-23Glu--Lys-beta-2. *American Journal of Human Genetics* **20**, 570-578 (1968).
- 117 Boyo, A. E. Starch gel electrophoresis of the haemoglobin of Nigerian children. A preliminary investigation of the incidence of thalassaemia. *The West African Medical Journal* **12**, 75-81 (1963).
- 118 Breguet, G., Ney, R., Kirk, R. L. & Blake, N. M. Genetic survey of an isolated community in Bali, Indonesia. II. Haemoglobin types and red cell isozymes. *Human Heredity* **32**, 308-317 (1982).
- 119 Brittenham, G. *et al.* Sickle cell anemia and trait in southern India: further studies. *American Journal of Hematology* **6**, 107-123 (1979).
- 120 Brittenham, G., Lozoff, B., Harris, J. W., Sharma, V. S. & Narasimhan, S. Sickle cell anemia and trait in a population of southern India. *American Journal of Hematology* **2**, 25-32 (1977).
- 121 Bronte-Stewart, B., Budtz-Olsen, D. E., Hickley, J. M. & Brock, J. F. The health and nutritional status of the kung Bushmen of Southwest Africa. *South African Journal of Laboratory and Clinical Medicine* **6**, 187-216 (1960).
- 122 Bruce-Tagoe, A. A. *et al.* Haematological values in a rural Ghanaian population. *Tropical and Geographical Medicine* **29**, 237-244 (1977).
- 123 Buettner Janusch, J. & Buettner Janusch, V. Haemoglobin S in the Malagasy. *Archives de l'Institut Pasteur de Madagascar* **39**, 211-214 (1970).
- 124 Cabannes, R., Larrouy, G., Fernet, P. & Sendrail, A. Etude hémotypologique des populations sédentaires de la Saoura (Sahara occidental). II. Les hémoglobines. *Bulletins et Mémoires de la Société d'Anthropologie de Paris* **12**, 139-142 (1969).
- 125 Cabannes, R., Larrouy, G. & Sendrail, A. Etude hémotypologique des populations du massif du Hoggar et du plateau de l'Air. III. Les hémoglobines. *Bulletins et Mémoires de la Société d'Anthropologie de Paris* **12**, 143-146 (1969).
- 126 Cabannes, R., Lefevre-Witier, P. & Sendrail, A. III. Etude des hémoglobines dans les populations du Tassili N'Ajjer. *Bulletins et Mémoires de la Société d'Anthropologie de Paris* **12**, 434-439 (1967).
- 127 Cabannes, R. *et al.* Etude hémotypologique des Koulango de Côte-d'Ivoire. *Annales de l'Université d'Abidjan - Faculté de Médecine* **9**, 16-32 (1975).
- 128 Cabannes, R. & Schmidt-Beurrier, A. Recherches sur les haemoglobines des populations indiennes de l'Amérique de Sud. *L'Anthropologie* **70**, 331-334 (1966).
- 129 Cabannes, R. *et al.* Etude hémotypologique et biologique des Attié du village d'Atiekwa. *Médecine d'Afrique Noire* **17**, 835-841 (1970).
- 130 Cabannes, R., Sy, B. & Schmidt-Beurrier, A. Etude des hémoglobinoses dans la région de Niamey (Moyen Niger). *Nouvelle Revue Française d'Hématologie* **7**, 309-313 (1967).
- 131 Cao, A. *et al.* Thalassaemia types and their incidence in Sardinia. *Journal of Medical Genetics* **15**, 443-447 (1978).

- 132 Carnevale, P. *et al.* Le paludisme à *Plasmodium falciparum* et le gène de la drépanocytose en République Populaire du Congo. I. Relation entre la parasitémie et le trait drépanocytaire à Djoumouna (région de Brazzaville). *Annales de génétique* **24**, 100-104 (1981).
- 133 Char, K. S. & Rao, P. R. Occurrence of hemoglobin D Los Angeles in Brahmins of Andhra Pradesh, South India. *Hemoglobin* **5**, 609-611 (1981).
- 134 Chaudhuri, S. *et al.* in *Proceedings of the 9th Congress of the International Society of Blood Transfusion*. (ed Totopara) 196-205 (Karger, S.).
- 135 Chhotray, G. P. & Ranjit, M. R. Prevalence of G-6-PD deficiency in a malaria endemic tribal area of Orissa (India). *Indian Journal of Medical Research* **92**, 443-446 (1990).
- 136 Chopra, J. G. & Mbaye, A. H. Sickling in Zanzibar Island - Its Incidence, regional variation, and relationship with splenomegaly rates. *Transactions of the Royal Society of Tropical Medicine and Hygiene* **63**, 270-274 (1969).
- 137 Choremis, C. *et al.* Three inherited red-cell abnormalities in a district of Greece. Thalassaemia, sickling, and glucose-6-phosphate-dehydrogenase deficiency. *Lancet* **1**, 907-909 (1963).
- 138 Choremis, C., Zannos-Mariolea, L. & Katamis, M. D. Frequency of glucose-6-phosphate-dehydrogenase deficiency in certain highly malarious areas of Greece. *Lancet* **1**, 17-18 (1962).
- 139 Choubisa, S. L., Choubisa, L., Pande, S. & Srivastava, Y. K. Incidence of abnormal haemoglobins and G-6-PD deficiency in school children of Udaipur (Rajasthan), India. *Journal of Tropical Medicine and Hygiene* **90**, 215-216 (1987).
- 140 Clark, T. D. *et al.* Factors determining the heterogeneity of malaria incidence in children in Kampala, Uganda. *The Journal of Infectious Diseases* **198**, 393-400 (2008).
- 141 Colauto, E. M. *et al.* Malaria no município de Humaita, Estado do Amazonas. XII - Frequencia de fatores de resistencia eritrocitaria na populacao geral e em doentes: hemoglobina S e sistema sanguineo Duffy. *Revista do Instituto de Medicina Tropical de Sao Paulo* **23**, 72-78 (1981).
- 142 Colbourne, M. J. & Edington, G. M. Sickling and malaria in the Gold Coast. *British Medical Journal*, 784-786 (1956).
- 143 Colbourne, M. J., Edington, G. M., Hughes, M. H. & Ward-Brew, A. A medical survey in a Gold Coast village. *Transactions of the Royal Society of Tropical Medicine and Hygiene* **44**, 271-290 (1950).
- 144 Colombo, B. & Felicetti, L. Admission of Hb S heterozygotes to a general hospital is relatively reduced in malarial areas. *Journal of Medical Genetics* **22**, 291-292 (1985).
- 145 Cresta, M. Antropologia morfologica e sierologica dei n'zakara della repubblica centroafricana. *La Ricerca Scientifica* **14**, 131-142 (1964).
- 146 Cresta, M. & Avoundogba, N. Risultati delio studio longitdinale dalla nascita a 5 anni in un gruppo di bambini di Porto Novo (Repubblica Popolare del Benin). *Rivista di Antropologia* **61**, 43-132 (1980).
- 147 Crompton, P. D. *et al.* Sickle cell trait is associated with a delayed onset of malaria: implications for time-to-event analysis in clinical studies of malaria. *The Journal of Infectious Diseases* **198**, 1265-1275 (2008).
- 148 Das, S. R., Kumar, N., Bhattacharjee, P. N. & Sastry, D. B. Blood groups (ABO, M-N and Rh), ABH secretion, sickle-cell, P.T.C. taste and color blindness in teh Mahar of Nagpur. *Journal of the Royal Anthropological Institute of Britain and Ireland* **91**, 345-355 (1961).
- 149 Das, S. R., Mukherjee, C. P. & B., S. D. Sickle-cell trait in Koraput District and other parts of India. *Acta Genetica et Statistica Medica* **17**, 62-73 (1967).
- 150 David, S. & Trincao, C. Drepanocitemia, defici encia da desidrogenase da glucose-6-fosfato (g-6-pd) eritrocit'aria e paludismo no posto do cuango (lunda-angola). *Anais do Instituto de Medicina Tropical* **20**, 5-15 (1963).

- 151 Delbrouck, J. Contribution à la génétique de la sicklémie; maintien de la fréquence élevée de sicklémie au Congo belge. *Annales de la Société Belge de Médecine Tropicale* **38**, 103-134 (1958).
- 152 Deliyannis, G. A. & Tavlarakis, N. Sickling phenomenon in Northern Greece. *British Medical Journal* **2**, 299-301 (1955).
- 153 Deloron, P. *et al.* Relationships between malaria prevalence and malaria-related morbidity in school children from two villages in central Africa. *American Journal of Tropical Medicine and Hygiene* **61**, 99-102 (1999).
- 154 Devoucoux, R. *et al.* Population genetics of abnormal haemoglobins in Burkina Faso, west Africa. *Annals of Human Biology* **18**, 295-302 (1991).
- 155 Deyde, V. M. *et al.* Epidemiological profile of hemoglobinopathies in the Mauritanian population. *Annals of Hematology* **81**, 320-321 (2002).
- 156 Dufrenot & Legait, J. P. Contribution a l'étude de la repartition des genes S et C hemoglobiques en Haute-Volta, au Mali et au Niger. *Bulletin de la Société de Pathologie Exotique et de ses Filiales* **63**, 606-614 (1970).
- 157 Edington, G. M. in *C.I.O.M.S. Symposium on Abnormal Haemoglobins* (eds J.H.P. Jonxis & J.F. Delafresnaye) 290-299 (Blackwell Scientific Publications, 1959).
- 158 Edozien, J. C. in *Abnormal Haemoglobins in Africa* (ed H. P. Jonxis) (Davis, F. A., 1965).
- 159 el-Hazmi, M. A., al-Swailem, A. & Warsy, A. S. Glucose-6-phosphate dehydrogenase deficiency and sickle cell genes in Bisha. *Journal of Tropical Pediatrics* **41**, 225-229 (1995).
- 160 el-Hazmi, M. A. & Warsy, A. S. Interaction between glucose-6-phosphate dehydrogenase deficiency and sickle cell gene in Saudi Arabia. *Tropical and Geographical Medicine* **39**, 32-35 (1987).
- 161 el-Hazmi, M. A., Warsy, A. S., Bahakim, H. H. & al-Swailem, A. Glucose-6-phosphate dehydrogenase deficiency and the sickle cell gene in Makkah, Saudi Arabia. *Journal of Tropical Pediatrics* **40**, 12-16 (1994).
- 162 el-Hazmi, M. A. F. & Warsy, A. S. The Frequency of Hbs and Glucose-6-Phosphate-Dehydrogenase Phenotypes in Relation to Malaria in Western Saudi-Arabia. *Saudi Medical Journal* **14**, 121-125 (1993).
- 163 Enevold, A. *et al.* Associations between alpha+-thalassemia and Plasmodium falciparum malarial infection in northeastern Tanzania. *The Journal of Infectious Diseases* **196**, 451-459 (2007).
- 164 Esrachowitz, S. R., Friedlander, S., Radloff, G. & Saunders, S. The sickle cell trait in Cape coloured persons. *South African Medical Journal* **26**, 239-240 (1952).
- 165 Ewing, N., Powars, D., Hilburn, J. & Schroeder, W. A. Newborn diagnosis of abnormal hemoglobins from a large municipal hospital in Los Angeles. *American Journal of Public Health* **71**, 629-631 (1981).
- 166 Fattoum, S. Les hémoglobinopathies en Tunisie. Revue actualisée des données épidémiologiques et moléculaires. *Tunisie Médicale* **84**, 687-696 (2006).
- 167 Fleming, A. F. *et al.* Anaemia in young primigravidae in the guinea savanna of Nigeria: sickle-cell trait gives partial protection against malaria. *Annals of Tropical Medicine and Parasitology* **78**, 395-404 (1984).
- 168 Fleming, A. F., Storey, J., Molineaux, L., Iroko, E. A. & Attai, E. D. Abnormal haemoglobins in the Sudan savanna of Nigeria. I. Prevalence of haemoglobins and relationships between sickle cell trait, malaria and survival. *Annals of Tropical Medicine and Parasitology* **73**, 161-172 (1979).
- 169 Fourquet, R. Etude hémotypologique ABO, MN et Rh de l'ethnie afar. *Médecine Tropicale : Revue du Corps de Santé Colonial* **29**, 669-679 (1969).
- 170 Fourquet, R. Etude hémotypologique des Somali Issa et Gadaboursi. *Médecine Tropicale : Revue du Corps de Santé Colonial* **30**, 353-362 (1970).



- 171 Foy, H., Kondi, A., Rebello, A. & Martins, F. The distribution of sickle cell trait and the incidence of sickle cell anaemia in the Negro tribes of Portuguese East Africa. *East African Medical Journal* **29**, 247-251 (1952).
- 172 Foy, H., Kondi, A., Timms, G. L., Brass, W. & Bushra, F. The variability of sickle-cell rates in tribes of Kenya and the Southern Sudan. *British Medical Journal* **1**, 294-297 (1964).
- 173 Gali, A. E. *et al.* A premarital screening programme of hemoglobinopathies in Hatay. *Annals of Medical Sciences* **8**, 88-92 (1999).
- 174 Gamet, A. Première étude sur les hémoglobinoses au centre-Cameroun. *Bulletin de la Société de Pathologie Exotique et de ses Filiales* **57**, 1125-1133 (1964).
- 175 Gatti, F., Van Ros, G. & Vandepitte, J. Hémoglobines anormales à la Maternité de Kinshasa. Une nouvelle famille congolaise avec hémoglobine E. *Annales de la Société Belge de Médecine Tropicale* **50**, 595-612 (1970).
- 176 Gentilini, M., M'Bengue, J. L., Danis, M. & Richard-Lenoble, D. Résultats de l'étude de l'électrophorese de l'hémoglobine chez 500 camerounais de la région de Fombot (Cameroun Oriental). *Médecine Tropicale : Revue du Corps de Santé Colonial* **32**, 579-585 (1972).
- 177 Ghatge, S. G., Pradhan, P. K. & Agarwal, S. Haemoglobin-S in Kurmi community of Madhya Pradesh--a preliminary report. *Indian Journal of Medical Research* **66**, 260-264 (1977).
- 178 Ghosh, K. *et al.* Splenomegaly in school children in a remote tribal area of Dhole district, Maharashtra. *Indian Journal of Malariology* **37**, 68-73 (2000).
- 179 Giri, A. K. *et al.* Some genetic markers in tribals of Eastern India. *Acta Anthropogenetica* **6**, 99-106 (1982).
- 180 Godber, M. *et al.* The blood groups, serum groups, red-cell isoenzymes and haemoglobins of the Sandawe and Nyaturu of Tanzania. *Annals of Human Biology* **3**, 463-473 (1976).
- 181 Goud, J. D. & Rao, P. R. Distribution of some genetic makers in the Yerukala Tribe of Andhra Pradesh. *Journal of the Indian Anthropological Society* **12**, 258-265 (1977).
- 182 Goud, J. D. & Rao, P. R. Genetic distances among the five tribal populations of Andhra, Pradesh, South India. *Anthropologischer Anzeiger* **37**, 1-9 (1979).
- 183 Greenwood, B. M. *et al.* The immune response to a meningococcal polysaccharide vaccine in an African village. *Transactions of the Royal Society of Tropical Medicine and Hygiene* **74**, 340-346 (1980).
- 184 Griffiths, S. B. Absence of the sickle cell trait in the Bushmen of South-West Africa. *Nature* **171**, 577-578 (1953).
- 185 Guler, E., Caliskan, U., Albayrak, C. U. & Karacan, M. Erratum: Prevalence of beta-thalassemia and sickle cell anemia trait in premarital screening in Konya Urban Area, Turkey (Journal of Pediatric Hematology/Oncology (2009) 29:11). *Journal of Pediatric Hematology/Oncology* **31**, 455 (2009).
- 186 Guler, E. & Karacan, M. Prevalence of beta-thalassemia and sickle cell anemia trait in premarital screening in Konya urban area, Turkey. *Journal of Pediatric Hematology/Oncology* **29**, 783-785 (2007).
- 187 Hamza, S. *et al.* Hereditary blood factors of North Sinai inhabitants. *Human biology; an international record of research* **48**, 193-202 (1976).
- 188 Hashmi, J. A. & Farzana, F. Letter: Thalassaemia trait, abnormal haemoglobins, and raised fetal haemoglobin in Karachi. *Lancet* **1**, 206 (1976).
- 189 Hassan, M. K., Taha, J. Y., Al-Naama, L. M., Widad, N. M. & Jasim, S. N. Frequency of haemoglobinopathies and glucose-6-phosphate dehydrogenase deficiency in Basra. *Eastern Mediterranean Health Journal* **9**, 45-54 (2003).
- 190 Hathorn, M. Haemoglobin levels in pregnant women in Accra. *Ghana Medical Journal* **2**, 55-61 (1963).

- 191 Herzog, P., Bohatova, J. & Drdova, A. Genetic polymorphisms in Kenya. *American Journal of Human Genetics* **22**, 287-291 (1970).
- 192 Hiernaux, J. Blood polymorphism frequencies in the Sara Majingay of Chad. *Annals of Human Biology* **3**, 127-140 (1976).
- 193 Horsfall, W. R. & Lehman, H. Absence of the sickle cell trait in seventy-two Australian aboriginals. *Nature* **172**, 638 (1953).
- 194 Horsfall, W. R. & Lehmann, H. Absence of abnormal haemoglobins in some Australian aboriginals. *Nature* **177**, 41-42 (1956).
- 195 Idowu, O. A., Mafiana, C. F. & Dapo, S. Anaemia in pregnancy: a survey of pregnant women in Abeokuta, Nigeria. *African Health Sciences* **5**, 295-299 (2005).
- 196 Iyer, S. R. *et al.* Sickle cell syndromes in and around Bardoli. *Journal of the Association of Physicians of India* **42**, 885-887 (1994).
- 197 Jacob, G. F. A study of the survival rate of cases of sickle-cell anaemia. *British Medical Journal* **1**, 738-739 (1957).
- 198 Jain, A. P., Khan, N. & Gupta, O. P. A survey of glucose-6-phosphate dehydrogenase deficiency and some of its correlates in a Maharashtra village. *Journal of the Indian Medical Association* **76**, 1-3 (1981).
- 199 Jain, R. C. Haemoglobinopathies in Libya. *Journal of Tropical Medicine and Hygiene* **82**, 128-132 (1979).
- 200 Jain, R. C. *et al.* Sickle cell trait, thalassaemia and glucose-6-phosphate dehydrogenase deficiency in the Bhil tribe of southern Rajasthan. *Indian Journal of Medical Research* **73**, 548-553 (1981).
- 201 Jelliffe, D. B. *et al.* The Health of Acholi Children. (with Special Reference to Congenital Abnormalities Following an Epidemic of "O'nyong-Nyong"). *Tropical and Geographical Medicine* **15**, 411-421 (1963).
- 202 Jelliffe, D. B., Bennett, F. J., White, R. H., Cullinan, T. R. & Jelliffe, E. F. The children of the Lugbara. A study in the techniques of paediatric field survey in tropical Africa. *Tropical and Geographical Medicine* **14**, 33-50 (1962).
- 203 Jenkins, T. Sickle Cell Anaemia in Wankie, Southern Rhodesia. *Central African Journal of Medicine* **40**, 307-319 (1963).
- 204 Jenkins, T., Blecher, S. R., Smith, A. N. & Anderson, C. G. Some hereditary red-cell traits in Kalahari Bushmen and Bantu: hemoglobins, glucose-6-phosphate dehydrogenase deficiency, and blood groups. *American Journal of Human Genetics* **20**, 299-309 (1968).
- 205 Jeremiah, Z. A. Abnormal haemoglobin variants, ABO and Rh blood groups among student of African descent in Port Harcourt, Nigeria. *African Health Sciences* **6**, 177-181 (2006).
- 206 Junien, C. *et al.* Glucose-6-phosphate dehydrogenase and hemoglobin variants in Kel Kummer Tuareg and related groups. Indirect evidence for alpha-thalassemia trait. *Human Heredity* **32**, 318-328 (1982).
- 207 Kafando, E., Sawadogo, M., Cotton, F., Vertongen, F. & Gulbis, A. Neonatal screening for sickle cell disorders in Ouagadougou, Burkina Faso: a pilot study. *Journal of Medical Screening* **12**, 112-114 (2005).
- 208 Kamel, K., Chandy, R., Mousa, H. & Yunis, D. Blood groups and types, hemoglobin variants, and G-6-PD deficiency among Abu Dhabians in the United Arab Emirates. *American Journal of Physical Anthropology* **52**, 481-484 (1980).
- 209 Kamel, K. *et al.* Anthropological studies among Libyans. Erythrocyte genetic factors, serum haptoglobin phenotypes and anthropometry. *American Journal of Physical Anthropology* **43**, 103-111 (1975).
- 210 Kaptue-Noche, L., Mbantenkhu, J. F. & Nsangow, J. F. I. in *Distribution and Evolution of the Haemoglobin and Globin Loci* (ed J. E. Bowman) 159-166 (Elsevier, 1983).
- 211 Kar, B. C. Sickle cell disease in India. *Journal of the Association of Physicians of India* **39**, 954-960 (1991).

- 212 Kate, S. L. *et al.* Red cell glucose-6-phosphate dehydrogenase deficiency and haemoglobin variants among ten endogamous groups of Maharashtra and West Bengal. *Human Genetics* **44**, 339-343 (1978).
- 213 Keskin, A., Turk, T., Polat, A., Koyuncu, H. & Saracoglu, B. Premarital screening of beta-thalassemia trait in the province of Denizli, Turkey. *Acta Haematologica* **104**, 31-33 (2000).
- 214 Kifude, C. & Waitumbi, J. Sick cell and alpha thalassemia in children participating in a malaria vaccine clinical trial in Kisumu, Kenya. *International Journal of Laboratory Hematology* **29**, 107-107 (2007).
- 215 Kirk, R. L., Lai, L. Y., Vos, G. H., Wickremasinghe, R. L. & Perera, D. J. The blood and serum groups of selected populations in South India and Ceylon. *American Journal of Physical Anthropology* **20**, 485-479 (1962).
- 216 Kofi Ekue, J. M., Wurapa, F. K. & Rwabwogo-Atenyi, J. Haemoglobin genotypes, glucose - 6 - phosphate dehydrogenase deficiency and bronchial asthma. *East African Medical Journal* **60**, 676-678 (1983).
- 217 Konate, L. *et al.* The epidemiology of multiple Plasmodium falciparum infections - 5. Variation of Plasmodium falciparum msp1 block 2 and msp2 allele prevalence and of infection complexity in two neighbouring Senegalese villages with different transmission conditions. *Transactions of the Royal Society of Tropical Medicine and Hygiene* **93**, S21-S28 (1999).
- 218 Kulkarni, A. G. & Jekeme, S. D. Cord blood screening for haemoglobinopathies in northern Nigeria. *Annals of Tropical Medicine and Parasitology* **80**, 549-551 (1986).
- 219 Kumar, N. & Ghosh, A. K. ABO blood groups and sickle-cell trait investigations in Madhya Pradesh, Ujjain and Dewas Districts. *Acta Genetica et Statistica Medica* **17**, 55-61 (1967).
- 220 Kumar, N. & Mukherjee, D. P. Genetic distances among the Ho tribe and other groups of Central Indians. *American Journal of Physical Anthropology* **42**, 489-494 (1975).
- 221 Labie, D., Richin, C., Pagnier, J., Gentilini, M. & Nagel, R. L. Hemoglobins S and C in Upper Volta. *Human Genetics* **65**, 300-302 (1984).
- 222 Lallemand, M. *et al.* Hemoglobin abnormalities. An evaluation on new-born infants and their mothers in a maternity unit close to Brazzaville (P.R. Congo). *Human Genetics* **74**, 54-58 (1986).
- 223 Lalouel, J. La sicklémie au gabon. *Bulletins et Mémoires de la Société d'Anthropologie de Paris*, 129-132 (1955).
- 224 Lauder, J. R. & Ibrahim, S. A. Sickling in south-West Kordofan. *Sudan Medical Journal* **8**, 207-214 (1970).
- 225 Laurens, A., Diakhate, L., Blavy, G., Diebolt, G. & Linhard, J. Drépanocytose et génétique. *Bulletin de la Société Médicale d'Afrique Noire de Langue Française* **23**, 441-444 (1978).
- 226 Lefranc, M. P. *et al.* Frequency of human A gamma 75Thr globin chain in a population from Tunisia. *Human Genetics* **59**, 89-91 (1981).
- 227 Lehmann, H. The absence of haemoglobin C in 104 East Africans living in Dar es Salaam. *Man* **55**, 200 (1955).
- 228 Lehmann, H., Maranjian, G. & Mourant, A. E. Distribution of sickle-cell hemoglobin in Saudi Arabia. *Nature* **198**, 492-493 (1963).
- 229 Lehmann, H. & Raper, A. B. Maintenance of high sickling rate in an African community. *British Medical Journal* **2**, 333-336 (1956).
- 230 Lehmann, H., Sharih, A. & Robinson, G. L. Sickle-cell haemoglobin in Pathan. *Man* **61**, 134 (1961).
- 231 Liljestrand, J., Bergstrom, S. & Birgegard, G. Anaemia of pregnancy in Mozambique. *Transactions of the Royal Society of Tropical Medicine and Hygiene* **80**, 249-255 (1986).

- 232 Linhard, J., Diebolt, G., Baylet, R. & Diop, S. Dépistage des hémoglobinoses dans deux populations serer. *Bulletin de la Société Médicale d'Afrique Noire de Langue Française* **18**, 587-589 (1973).
- 233 Malaria Genomic Epidemiology Network. Pers. Com. Further details can be found at <http://www.malariagen.net/home/science/localprojects.php>. (2009).
- 234 Marti, H. R., Schoepf, K. & Gsett, O. R. Frequency of hemoglobin S and glucose-6-phosphate dehydrogenase deficiency in Southern Tanzania. *British Medical Journal* **1**, 1476-1477 (1965).
- 235 Matson, G. A., Sutton, H. E., Swanson, J. & Robinson, A. Distribution of hereditary blood groups among Indians in South America. II. In Peru. *American Journal of Physical Anthropology* **24**, 325-349 (1966).
- 236 Mauran-Sendrail, A., Bouloux, C., Gomila, J. & Langaney, A. Comparative study of haemoglobin types of two populations of eastern Senegal--Bedik and Niokholonko. *Annals of Human Biology* **2**, 129-136 (1975).
- 237 Migot-Nabias, F. *et al.* Human genetic factors related to susceptibility to mild malaria in Gabon. *Genes and Immunity* **1**, 435-441 (2000).
- 238 Mitchell, R. & Fupi, F. Sickling in Tanzania. *East African Medical Journal* **49**, 638-642 (1973).
- 239 Mockenhaupt, F. P. *et al.* Anaemia in pregnant Ghanaian women: importance of malaria, iron deficiency, and haemoglobinopathies. *Transactions of the Royal Society of Tropical Medicine and Hygiene* **94**, 477-483 (2000).
- 240 Modebe, O. The effect of homozygous sickle cell disease on the age at menarche in Nigerian schoolgirls. *Annals of Human Biology* **14**, 181-185 (1987).
- 241 Modica, R., Livadiotti, M. & Macaluso, A. S. Incidenza della sickleemia progressa malaria a distribuzione razziale nell' area costiera di Tauorga. *Archivio Italiano di Scienze Mediche Tropicali e di Parassitologia* **41**, 595-604 (1960).
- 242 Monekosso, G. L. Clinical Survey of a Yoruba Village. *The West African Medical Journal* **13**, 47-59 (1964).
- 243 Monekosso, G. L. & Ibiama, A. A. Splenogamy and sickle-cell trait in a malaria-endemic village. *Lancet* **1** (1966).
- 244 Moormann, A. M. *et al.* Frequencies of sickle cell trait and glucose-6-phosphate dehydrogenase deficiency differ in highland and nearby lowland malaria-endemic areas of Kenya. *Transactions of the Royal Society of Tropical Medicine and Hygiene* **97**, 513-514 (2003).
- 245 Motulsky, A. G., Vandepitte, J. & Fraser, G. R. Population genetic studies in the Congo. I. Glucose-6-phosphate dehydrogenase deficiency, hemoglobin S, and malaria. *American Journal of Human Genetics* **18**, 514-537 (1966).
- 246 Mukherjee, B., Kate, S. L., Bhanu, B. V. & Kurian, J. C. Etude de douze marqueurs genetiques sanguins chez les Santals du Bengale occidental et les Madias de Maharashtra (Inde). *L'Anthropologie* **85**, 119-124 (1981).
- 247 Munyanganizi, R., Cotton, F., Vertongen, F. & Gulbis, B. Red blood cell disorders in Rwandese neonates: screening for sickle cell disease and glucose-6-phosphate dehydrogenase deficiency. *Journal of Medical Screening* **13**, 129-131 (2006).
- 248 Mutesa, L. *et al.* Neonatal screening for sickle cell disease in Central Africa: a study of 1825 newborns with a new enzyme-linked immunosorbent assay test. *Journal of Medical Screening* **14**, 113-116 (2007).
- 249 Nasr, A., Elghazali, G., Giha, H., Troye-Blomberg, M. & Berzins, K. Interethnic differences in carriage of haemoglobin AS and Fcγ receptor IIa (CD32) genotypes in children living in eastern Sudan. *Acta Tropica* **105**, 191-195 (2008).
- 250 Nayudu, N. V. Field survey for sickle cell disease in the tribal population of East Godavari District, Andhra Pradesh. *Journal of the Association of Physicians of India* **38**, 479-481 (1990).

- 251 Neel, J. V. *et al.* Data on the occurrence of hemoglobin C and other abnormal hemoglobins in some African populations. *American Journal of Human Genetics* **8**, 138-150 (1956).
- 252 Negi, R. S. The incidence of sickle-cell trait in Bastar. II. *Man* **63**, 22 (1963).
- 253 Nguematcha, R., Savina, J. F., Juhan, I., Boche, R. & Ravisse, P. Recherche de la tare drépanocytaire dans un groupe Pygmée du Sud Cameroun. *Médecine d'Afrique Noire* **20**, 605-606 (1973).
- 254 Nhonoli, A. M., Kujwalile, J. M., Kigoni, E. P. & Masawe, A. E. Correlation of glucose-6-phosphate dehydrogenase (G-6-PD) deficiency and sickle cell trait (Hb-AS). *Tropical and Geographical Medicine* **30**, 99-101 (1978).
- 255 Niazi, G. A. & Fleming, A. F. Haematological status of blood-donors with sickle cell trait and alpha thalassaemia in northern Nigeria. *East African Medical Journal* **66**, 824-829 (1989).
- 256 Nieuwenhuis, F., Wolf, B., Bomba, A. & De Graaf, P. Haematological study in Cabo Delgado province, Mozambique; sickle cell trait and G6PD deficiency. *Tropical and Geographical Medicine* **38**, 183-187 (1986).
- 257 North, M. L., Piffaut, M. C., Duwig, I., Locoh-Donou, A. G. & Locoh-Donou, A. M. Detection of haemoglobinopathies at birth in Togo. *Nouvelle Revue Française d'Hématologie* **30**, 237-241 (1988).
- 258 Nurse, G. T. & Jenkins, T. Serogenetic studies on the Kavango peoples of South West Africa. *Annals of Human Biology* **4**, 465-478 (1977).
- 259 Nurse, G. T., Jenkins, T., David, J. H. & Steinberg, A. G. The Njinga of Angola: a serogenetic study. *Annals of Human Biology* **6**, 337-348 (1979).
- 260 Odunvbun, M. E., Okolo, A. A. & Rahimy, C. M. Newborn screening for sickle cell disease in a Nigerian hospital. *Public Health* **122**, 1111-1116 (2008).
- 261 Ogala, W. N. Haematological values in healthy Nigerian infants. *Annals of Tropical Paediatrics* **6**, 63-66 (1986).
- 262 Ohene-Frempong, K., Oduro, J., Tetteh, H. & Nkrumah, F. Screening newborns for sickle cell disease in Ghana. *Pediatrics* **121**, S120-S121 (2008).
- 263 Omer, A. *et al.* Incidence of G-6-PD deficiency and abnormal haemoglobins in the indigenous and immigrant tribes of the Sudan. *Tropical and Geographical Medicine* **24**, 401-405 (1972).
- 264 Ondo, A. La drépanocytose au Gabon. Aspects épidémiologiques et préventifs. *Clinical Respiratory Physiology* **19**, 383 (1983).
- 265 Oomen, J. M., Meuwissen, J. H. & Gemert, W. Differences in blood status of three ethnic groups inhabiting the same locality in Northern Nigeria. Anaemia, splenomegaly and associated causes. *Tropical and Geographical Medicine* **31**, 587-606 (1979).
- 266 Oudart, J. L., Diadhiou, Sarrat, H. & Satge, P. L'hémoglobine du nouveau-né africain. *Semaine des Hôpitaux* **44**, 3073-3081 (1968).
- 267 Ozsoylu, S. & Sahinoglu, M. Haemoglobinopathy survey in an Eti-Turk village. *Human Heredity* **25**, 50-59 (1975).
- 268 Pales, L., Gallais, P., Bert, J. & Fourquet, R. La sicklémie (sickle cell trait) chez certaines populations nigéro-tchadiennes de l'Afrique Occidentale française. *L'Anthropologie* **58**, 472-480 (1954).
- 269 Papiha, S. S. Haptoglobin and abnormal haemoglobin types in Sinhalese and Punjabis. *Human Heredity* **23**, 147-153 (1973).
- 270 Penalzoza-Espinosa, R. I. *et al.* Frecuencia de la hemoglobina S en cinco poblaciones mexicanas y su importancia en la salud publica. *Salud publica de Mexico* **50**, 325-329 (2008).
- 271 208 Perine, P. L. & Michael, M. T. A preliminary survey for glucose-6-phosphate dehydrogenase deficiency and haemoglobin S in Ethiopia. *Ethiopian Medical Journal* **12**, 179-184 (1974).

- 272 Piliszek, T. S. Hb Bart's and its significance in the South African Negro. *Acta Haematologica* **61**, 33-38 (1979).
- 273 Pollitzer, W. S., Chernoff, A. I., Horton, L. L. & Froehlich, M. Hemoglobin patterns in American Indians. *Science* **129**, 216 (1959).
- 274 Quadri, M. I., Islam, S. I. & Nasserullah, Z. The effect of alpha-thalassemia on cord blood red cell indices and interaction with sickle cell gene. *Annals of Saudi Medicine* **20**, 367-370 (2000).
- 275 Ragusa, A. *et al.* Presence of an African beta-globin gene cluster haplotype in normal chromosomes in Sicily. *American Journal of Hematology* **40**, 313-315 (1992).
- 276 Ramesh, M., Balakrishna, A. & Veerajaju, P. Sickle cell haemoglobin and glucose-6-phosphate dehydrogenase deficiency among Dhobis of Visakhapatnam, Andhra Pradesh, India. *Anthropologischer Anzeiger* **51**, 173-177 (1993).
- 277 Rao, P. R. & Goud, J. D. Sickle-cell haemoglobin and glucose-6-phosphate dehydrogenase deficiency in tribal populations of Andhra Pradesh. *Indian Journal of Medical Research* **70**, 807-813 (1979).
- 278 Rao, V. R., Sathe, M. S., Gorakshakar, A. C. & Vasantha, K. Genetic heterogeneity and population structure of Gond-related tribes in the Vidarbha region of Maharashtra. *Human Biology* **64**, 903-917 (1992).
- 279 Ravisse, P. Recherches sur la sicklémie chez les Pygmées de l'Afrique Equatoriale Française. *L'Anthropologie* **56**, 491-493 (1952).
- 280 Reddy, P. H. & Modell, B. Reproductive behaviour and natural selection for the sickle gene in the Baiga tribe of central India: the role of social parenting. *Annals of Human Genetics* **60**, 231-236 (1996).
- 281 Ringelhann, B., Dodu, S. R. A., Konotey-Ahulu, F. I. D. & Lehmann, H. A survey for haemoglobin variants, thalassemia and glucose-6-phosphate dehydrogenase deficiency in Northern Ghana. *Ghana Medical Journal* **7**, 120-124 (1968).
- 282 Rizzotti, G. Falcemia e malattia falcemia. Prime osservazioni circa la loro diffusione nella regione di Addis Abeba. *Archivio Italiano di Scienze Mediche Tropicali e di Parassitologia* **36**, 555-563 (1955).
- 283 Roberts, D. F. & Boyo, A. E. Abnormal haemoglobins in childhood among the Yorba. *Human Biology* **34**, 20-37 (1962).
- 284 Roberts, D. F. & Lehmann, H. A search for abnormal haemoglobins in some southern Sudanese peoples. *British Medical Journal* **1**, 519-521 (1955).
- 285 Ropero, P., Molina, L., Gonzalez, F. A. & Villegas, A. Incidencia de la anemia de celulas falciformes en Guinea Ecuatorial. *Medicina clinica* (2009).
- 286 Ruano-Ravina, A. Cribado neonatal de hemoglobinopatías. Una visión desde la salud pública. *Medicina Clinica* **129**, 174-175 (2007).
- 287 Sadek, S. H. Sickle cell trait in North Nigeria. *Journal of Tropical Medicine and Hygiene* **77**, 61-64 (1974).
- 288 Saha, N. Erythrocyte glutathione reductase polymorphism in a Sudanese population. *Human Heredity* **31**, 32-34 (1981).
- 289 Saha, N., Kirk, R. L., Shanbhag, S., Joshi, S. H. & Bhatia, H. M. Genetic studies among the Kadar of Kerala. *Human Heredity* **24**, 198-218 (1974).
- 290 Saha, N., Kirk, R. L., Shanbhag, S., Joshi, S. R. & Bhatia, H. M. Population genetic studies in Kerala and the Nilgiris (South West India). *Human Heredity* **26**, 175-197 (1976).
- 291 Saha, N. & Patgunarajah, N. Phenotypic and quantitative relationship of red cell acid phosphatase with haemoglobin, haptoglobin, and G6PD phenotypes. *Journal of Medical Genetics* **18**, 271-275 (1981).
- 292 Saha, N., Tay, J., Piplai, C., Gupta, R. & Roy, S. K. Genetic studies among the sedentes and migrant Oraons of eastern India. *American Journal of Physical Anthropology* **76**, 321-330 (1988).

- 293 Salazar Leite, A., Jorge Janz, G. & Gandara, A. F. Relatorio da Missao do Instituto de Medicina Tropical a Angola (1954) Em colaboracao com a Missao de Prospeccao de endemias de Angola. *Anais do Instituto de Medicina Tropical* **12**, 129-254 (1954).
- 294 Salzano, F. M. Incidence, effects, and management of sickle cell disease in Brazil. *American Journal of Pediatric Hematology/Oncology* **7**, 240-244 (1985).
- 295 Salzano, F. M., Da Rocha, F. J. & Tondo, C. V. Hemoglobin types and gene flow in Porto Alegre, Brazil. *Acta Genetica et Statistica Medica* **18**, 449-457 (1968).
- 296 Samatani, R., Mondal, P. R. & Saraswathy, K. N. Glucose-6-phosphate dehydrogenase deficiency and sickle cell hemoglobin among the Warli tribe of Dadra and Nagar Haveli. *Anthropologist* **10**, 301-303 (2008).
- 297 Samuel, A. P. *et al.* Association of red cell glucose-6-phosphate dehydrogenase with haemoglobinopathies. *Human Heredity* **36**, 107-112 (1986).
- 298 Sansarricq, H., Marill, G., Portier, A. & Cabannes, R. Les hemoglobinopathies en Haute Volta. *Sangre* **30**, 503-511 (1959).
- 299 Santos David, J. H. A Drepanocitomie e a Anthropologica. (Lisbon, 1960).
- 300 Saraswathy, K. N. & Sachdeva, M. P. G6PD deficiency, sickle cell trait, haptoglobin and transferrin polymorphisms among Koyadoras and Nayakpods of Andhra Pradesh. *Anthropologist* **10**, 163-165 (2008).
- 301 Sarr, J. B. *et al.* Impact of red blood cell polymorphisms on the antibody response to *Plasmodium falciparum* in Senegal. *Microbes and Infection* **8**, 1260-1268 (2006).
- 302 Saugrain, J. Nouvelles recherches sur la drépanocytose à Madagascar. *Bulletin de la Société de Pathologie Exotique et de ses Filiales* **50**, 480-486 (1957).
- 303 Schiliro, G., Gregorio, F. D., Romeo, M. A., Testa, R. & Russo, A. Incidence of Hemoglobin S Carriers in Sicily. *Hemoglobin* **10**, 95-99 (1986).
- 304 Segbena, A. Y. *et al.* Hemoglobins in Togolese newborns: Hb S, Hb C, Hb Bart's, and alpha-globin gene status. *American Journal of Hematology* **59**, 208-213 (1998).
- 305 Selim, O. *et al.* Genetic markers and anthropometry in the populations of the Egyptian oases of El-Kharga and El-Dakhla. *Human Heredity* **24**, 259-272 (1974).
- 306 Sen, R. *et al.* Alpha-thalassemia among tribal populations of Eastern India. *Hemoglobin* **29**, 277-280 (2005).
- 307 Sepha, G. C. *et al.* Problems of haemoglobin anomalies in Raipur (Madhya Pradesh). *Journal of the Association of Physicians of India* **27**, 291-297 (1979).
- 308 Simbeye, A. G. An analysis of some hemoglobin and haptoglobin phenotypes in Blantyre, Malawi. *American Journal of Human Genetics* **23**, 510-512 (1971).
- 309 Simpoire, J. *et al.* Glucose-6-phosphate dehydrogenase deficiency and sickle cell disease in Burkina Faso. *Pakistan Journal of Biological Sciences* **10**, 409-414 (2007).
- 310 Sokhna, C. S., Rogier, C., Dieye, A. & Trape, J. F. Host factors affecting the delay of reappearance of *Plasmodium falciparum* after radical treatment among a semi-immune population exposed to intense perennial transmission. *American Journal of Tropical Medicine and Hygiene* **62**, 266-270 (2000).
- 311 Spedini, G. *et al.* Some genetic erythrocyte polymorphisms in the Mbugu and other populations of the Central African Republic with an analysis of genetic distances. *Anthropologischer Anzeiger* **39**, 10-19 (1981).
- 312 Spedini, G., Fuciarelli, M. & Rickards, O. Blood polymorphism frequencies in the Tofinu, the "Water Men" of Southern Benin. *Anthropologischer Anzeiger* **38**, 121-130 (1980).
- 313 Stirnadel, H. A. *et al.* Malaria infection and morbidity in infants in relation to genetic polymorphisms in Tanzania. *Tropical Medicine and International Health* **4**, 187-193 (1999).
- 314 Sukumaran, P. K., Sanghvi, L. D. & Vyas, G. N. Sickle cell trait in some tribes of western India. *Current Science* **25**, 290-291 (1956).

- 315 Sunna, E. I., Gharaibeh, N. S., Knapp, D. D. & Bashir, N. A. Prevalence of hemoglobin S and beta-thalassemia in northern Jordan. *Journal of Obstetrics and Gynaecology Research* **22**, 17-20 (1996).
- 316 Suzuki, A. *et al.* The distribution of hereditary erythrocytic disorders associated with malaria, in a lowland area of Nepal: a micro-epidemiological study. *Annals of Tropical Medicine and Parasitology* **101**, 113-122 (2007).
- 317 Swindler, D. R. The absence of the sickle cell gene in several Melanesian societies and its anthropologic significance. *Human Biology* **27**, 284-293 (1955).
- 318 Talafih, K., Hunaiti, A. A., Gharaibeh, N., Gharaibeh, M. & Jaradat, S. The prevalence of hemoglobin S and glucose-6-phosphate dehydrogenase deficiency in Jordanian newborn. *Journal of Obstetrics and Gynaecology Research* **22**, 417-420 (1996).
- 319 Theodoridou, S. *et al.* Carrier screening and prenatal diagnosis of hemoglobinopathies. A study of indigenous and immigrant couples in northern Greece, over the last 5 years. *Hemoglobin* **32**, 434-439 (2008).
- 320 Tiwary, V. K., Pradhan, P. K. & Agarwal, S. Haemoglobin-S in scheduled castes and scheduled tribes of Raipur (Madhya Pradesh) - a preliminary report. *Indian Journal of Medical Research* **71**, 397-401 (1980).
- 321 Tosun, F., Bilgin, A., Kizilok, A., Arpacı, A. & Yüregir, G. T. Five-year evaluation of premarital screening program for hemoglobinopathies in the province of Mersin, Turkey. *Turkish Journal of Haematology* **23**, 84-89 (2006).
- 322 Trabuchet, G., Dahmane, M. & Benabadi, M. Hémoglobines anormales en Algérie. *Semaine des Hôpitaux* **53**, 879-881 (1977).
- 323 Trincao, C. Hemoglobinas anormais nos territorios Portuguesas. *Boletim Clínico dos Hospitais Civis de Lisboa* **21**, 813-827 (1957).
- 324 Trincao, C., Pinto, A. R., de, A. C. & Gouveia, E. A drepanocitemia entre a tribo papel da Guine Portuguesa. *Anais do Instituto de Medicina Tropical* **7**, 125-129 (1950).
- 325 Trowell, H. C., Raper, A. B. & Welbourn, H. F. The natural history of homozygous sickle-cell anaemia in Central Africa. *The Quarterly Journal of Medicine* **26**, 401-422 (1957).
- 326 Tshilolo, L. *et al.* Neonatal screening and clinical care programmes for sickle cell disorders in sub-Saharan Africa: lessons from pilot studies. *Public Health* **122**, 933-941 (2008).
- 327 Vafa, M., Troye-Blomberg, M., Anchang, J., Garcia, A. & Migot-Nabias, F. Multiplicity of *Plasmodium falciparum* infection in asymptomatic children in Senegal: relation to transmission, age and erythrocyte variants. *Malaria Journal* **7**, 17 (2008).
- 328 Van Baelen, H., Vandepitte, J., Cornu, G. & Eeckels, R. Routine detection of sickle-cell anaemia and haemoglobin Bart's in Congolese neonates. *Tropical and Geographical Medicine* **21**, 412-426 (1969).
- 329 van den Berghe, L. J. & Janssen, P. Maladie à sickle cells en Afrique noire. *Annales de la Société Belge de Médecine Tropicale* **30**, 1553-1566 (1950).
- 330 Vandepitte, J. & Dherte, P. Enquête sur les hémoglobines anormales à Stanleyville. *Annales de la Société Belge de Médecine Tropicale* **39**, 711-715 (1959).
- 331 Vandepitte, J. & Motulsky, A. G. Abnormal haemoglobins in the Kasai province of the Belgian Congo. *Nature* **177**, 757 (1956).
- 332 Vella, F. in *Abnormal Haemoglobins in Africa* 339-355 (1965).
- 333 Vella, F. Hemoglobin variants in Saskatchewan. *Clinical Biochemistry* **1**, 118-134 (1967).
- 334 Walter, H., Neumann, S. & Nemeskeri, J. Populationsgenetische Untersuchungen über die Verteilung von Hamoglobin S und Glucose-6-Phosphat-Dehydrogenasemangel im Bodrogkoz (Nordostungarn). *Humangenetik* **1**, 561-567 (1965).
- 335 Wambua, S., Mwacharo, J., Uyoga, S., Macharia, A. & Williams, T. N. Co-inheritance of alpha+ thalassaemia and sickle trait results in specific effects on haematological parameters. *British Journal of Haematology* **133**, 206-209 (2006).



- 336 Welch, S. G. *et al.* Blood group, serum protein and red cell enzyme polymorphisms in a population from the Seychelles Islands. *Human Heredity* **25**, 346-353 (1975).
- 337 Wen-pin, C. *et al.* Two D-group abnormal hemoglobin found in Mongolian herdsmen. *Journal of Genetics and Genomics* **5**, 263-268 (1978).
- 338 Willcox, M. C. Thalassaemia in northern Liberia. A survey in the Mount Nimba area. *Journal of Medical Genetics* **12**, 55-63 (1975).
- 339 Williams, T. Pers. Com. (2009).
- 340 Yawson, G. & Marbell, E. C. Abnormal haemoglobins in 4000 blood donors at Korle Bu. *Ghana Medical Journal* **12**, 22-26 (1973).
- 341 Yüregir, G. T. *et al.* Population at risk for hemoglobinopathies in Cukurova, Turkiye: Need for prenatal diagnosis. *Annals of Medical Sciences* **4**, 61-69 (1995).
- 342 Yüregir, G. T., Kilinc, M., Ekerbiçer, H., Bilalođlu, N. & Tekin, N. Screening of hemoglobinopathies in Kahramanmara°, Turkey. *Turkish Journal of Haematology* **18**, 79-83 (2001).
